# Supplementary material
Source: publisher figshare collection journal article supplement (https://acs.figshare.com/ndownloader/files/5427551)
Supplement: Supplementary file 1 [file 5427551]

## Supporting Information

### High Performance Liquid Chromatography at $-196^{\circ}\text{C}$

Tomohiro Motono, Shinya Kitagawa\*, Hajime Ohtani

*Department of Materials Science and Engineering, Graduate School of Engineering, Nagoya Institute of Technology, Gokiso, Showa, Nagoya 466-8555, Japan*

Fax: +81-52-735-5368 E-mail kitagawa.shinya@nitech.ac.jp

#### Content

- Supplementary Table S1: Chemical properties of analytes.
- Supplementary Figure S1: Phase diagram of nitrogen.
- Supplementary Figure S2: Schematic of ultra-low temperature liquid chromatograph using a mixture of nitrogen and methane as the mobile phase.
- Supplementary Figure S3: Effect of injection amount on the elution of ethane.
- Supplementary Figure S4: Relationship between carbon number in alkane and the retention factor ( $k$ ) in HPLC at  $-196^{\circ}\text{C}$  with a pure liquid nitrogen mobile phase.
- Supplementary Figure S5: Relationship between density of nitrogen and temperature at various pressure. (A) density vs.  $T$ , (B) density vs.  $1/T$ .

**Supplementary Table S1****Table S1.** Chemical properties of analytes.

|                                            | m.p. | b.p. | Triple point |                        | Critical point |       |
|--------------------------------------------|------|------|--------------|------------------------|----------------|-------|
|                                            | [°C] | [°C] | [°C]         | [MPa]                  | [°C]           | [MPa] |
| N <sub>2</sub>                             | -210 | -196 | -210         | 0.0125                 | -145           | 3.40  |
| Ar                                         | -189 | -186 | -189         | 0.689                  | -122           | 4.86  |
| CH <sub>4</sub>                            | -183 | -163 | -182         | 0.0117                 | -83            | 4.60  |
| C <sub>2</sub> H <sub>6</sub>              | -183 | -89  | -183         | $1.13 \times 10^{-6}$  | 32             | 4.87  |
| C <sub>3</sub> H <sub>8</sub>              | -188 | -42  | -188         | $1.72 \times 10^{-10}$ | 97             | 4.25  |
| <i>n</i> -C <sub>4</sub> H <sub>10</sub>   | -138 | -1   | -138         | $6.74 \times 10^{-7}$  | 152            | 3.80  |
| <i>iso</i> -C <sub>4</sub> H <sub>10</sub> | -160 | -12  | -159         | $1.21 \times 10^{-8}$  | 135            | 3.63  |
| C <sub>2</sub> H <sub>4</sub>              | -169 | -104 | -169         | $1.22 \times 10^{-4}$  | 9              | 5.04  |
| C <sub>3</sub> H <sub>6</sub>              | -185 | -47  | -185         | $7.44 \times 10^{-10}$ | 91             | 4.56  |

**Supplementary Figure S1**

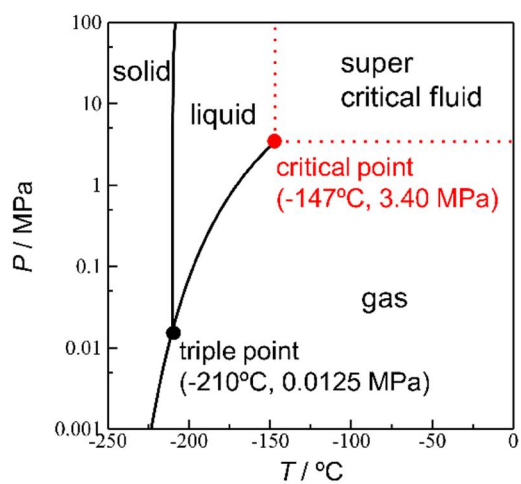

**Figure S1.** Phase diagram of nitrogen.

**Supplementary Figure S2**

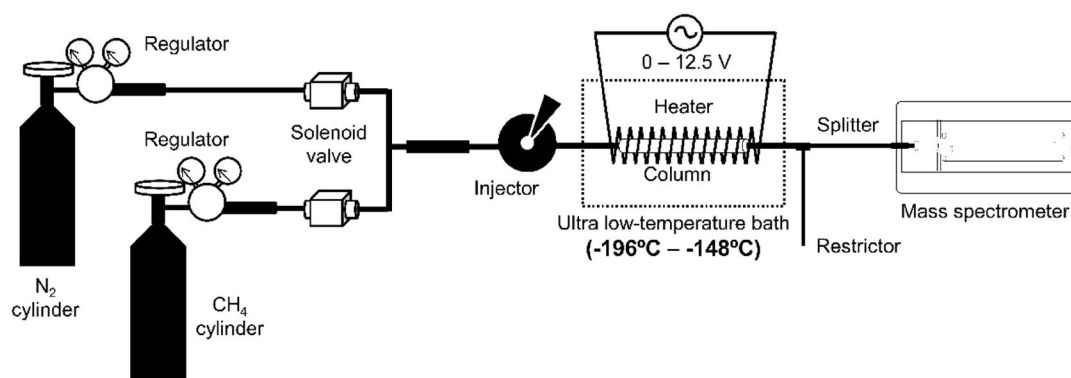

**Figure S2.** Schematic of ultra-low temperature liquid chromatograph using a mixture of nitrogen and methane as the mobile phase.

**Supplementary Figure S3**

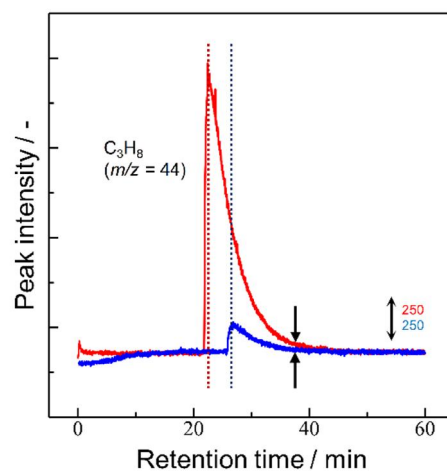

**Figure S3.** Effect of injection amount on the elution of propane.

**Supplementary Figure S4**

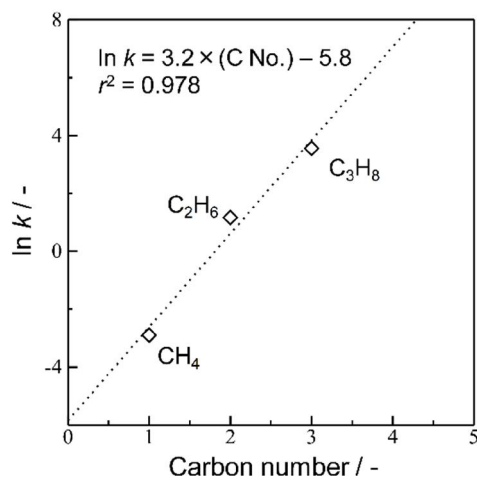

**Figure S4.** Relationship between carbon number in alkane and the retention factor ( $k$ ) in HPLC at  $-196^\circ\text{C}$  with a pure liquid nitrogen mobile phase.

**Supplementary Figure S5**

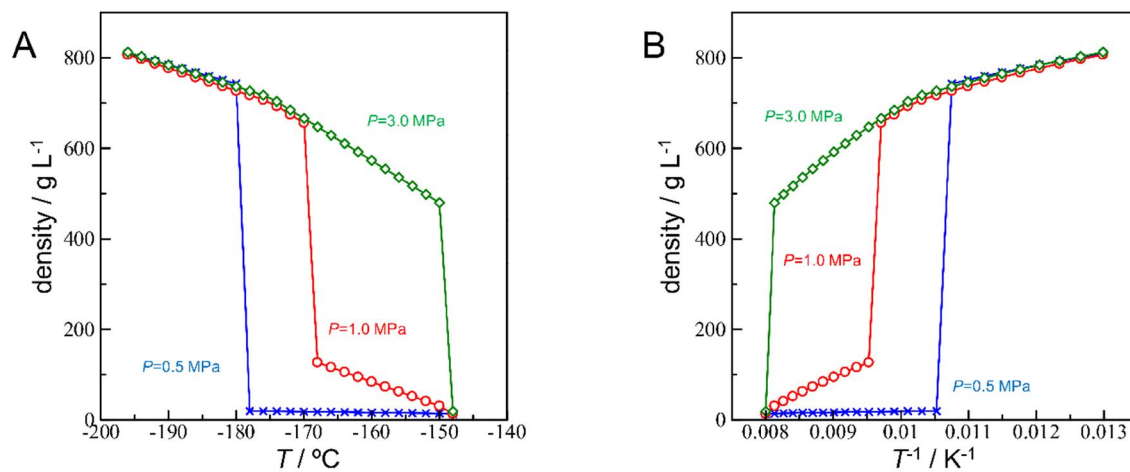

**Figure S5.** Relationship between density of nitrogen and temperature at various pressure. (A) density vs.  $T$ , (B) density vs.  $1/T$ .
